# Supplementary material
Source: Royal Society of Chemistry journal article supplement (doi:10.1039/d6nr00349d)
Supplement: d6nr00349d1.pdf [file d6nr00349d1.pdf]

## Supporting Information

### **Reductive Contact and Dipolar Interface Engineering Enable Stable Flexible CsSnI<sub>3</sub> Nanowire Photodetectors**

*Letian Dai<sup>a,b,\*</sup>, Wanru Chen<sup>c</sup>, Quanming Geng<sup>a</sup>, Ying Xu<sup>a</sup>, Guowu Zhou<sup>d</sup>, Nuo Chen<sup>e</sup>,  
Xiongjie Li<sup>f,\*</sup>*

<sup>a</sup> Wuhan National Laboratory for Optoelectronics, Huazhong University of Science and Technology, 1037 Luoyu Road, Wuhan 430074, Hubei, P. R. China

<sup>b</sup> Optics Valley Laboratory, Hubei 430074, P. R. China

<sup>c</sup> Wuhan Huaming Renewable Energy Institute, 122 Zhongbei Road, Wuhan 430077, Hubei, P.R. China

<sup>d</sup> Wuhan Haisipulin Technology Development Co., Ltd, 897 Gexin Road, Wuhan, 430023, Hubei, P.R. China

<sup>e</sup> Department of Electrical Engineering, Karlsruhe Institute of Technology, Karlsruhe 76131, Germany

<sup>f</sup> Key Laboratory of Catalysis and Energy Materials Chemistry of Ministry of Education & Hubei Key Laboratory of Catalysis and Materials Science, Key Laboratory of Analytical Chemistry of the State Ethnic Affairs Commission, Hubei R&D Center of Hyperbranched Polymers Synthesis and Applications, South-Central Minzu University, Wuhan, Hubei, 430074, P.R. China

\*Email: [ldai@hust.edu.cn](mailto:ldai@hust.edu.cn), [xiongjieli@mail.scuec.edu.cn](mailto:xiongjieli@mail.scuec.edu.cn).

## **S1. Materials and Preparation**

CsI (99.99%, Alfa Aesar), SnI<sub>2</sub> (99.99%, Sigma-Aldrich), DMF (*N,N*-dimethylformamide, 99.8%, Sigma-Aldrich), DMSO (Dimethyl sulfoxide, 99.5%, Sigma-Aldrich), PMMA (Poly(methyl methacrylate), average Mw ~15,000 by GPC, Macklin), Carbon rod (100mm, diameter 5.0mm, Macklin) and 3F-2NA (3-Fluoro-2-nitroanisole, 99.7%, Macklin) were used as received without further purification. Aluminum foil (type 1060) with a thickness of 0.2 mm and a high purity  $\geq 99.60\%$  was obtained from an enterprise in Hubei province of China. A 200 mL aqueous solution of 18 wt% sulfuric acid was prepared by slowly adding 22 mL of concentrated H<sub>2</sub>SO<sub>4</sub> (98%, Macklin) into 178 mL of deionized water under constant stirring and cooling.

## **S2. Fabrication of CsSnI<sub>3</sub> Nanowire Photodetector**

Prior to use, the aluminum foil was ultrasonically cleaned in ethanol for 15 min and dried under nitrogen. Anodization was performed in 18 wt% H<sub>2</sub>SO<sub>4</sub> at 0–5 °C under 25 V for 60 min to form an anodic Al<sub>2</sub>O<sub>3</sub> layer. After rinsing and drying, a nanosecond 650 nm pulsed laser was used to locally ablate the Al<sub>2</sub>O<sub>3</sub> layer, exposing the metallic Al regions that act as the conductive base.

The effective area of the device was defined by the laser-patterned circular opening on the anodized Al<sub>2</sub>O<sub>3</sub>/Al substrate, where metallic Al was exposed and CsSnI<sub>3</sub> nanowires were selectively grown. The diameter of the circular active region was approximately 3 mm, corresponding to a geometric area of  $\sim 0.071$  cm<sup>2</sup>. This value is consistent with the illumination area of  $\sim 0.07$  cm<sup>2</sup> used in the optoelectronic measurements, ensuring that the measured photocurrent originates from the predefined active nanowire device region.

In a glovebox environment with O<sub>2</sub> and H<sub>2</sub>O levels maintained below 0.01 ppm, a 1.5 M CsSnI<sub>3</sub> precursor solution (prepared by dissolving CsI and SnI<sub>2</sub> in a stoichiometric ratio of 1:1 in DMF) was drop-cast onto the laser-exposed Al surface and dried at room temperature for 12 h under a controlled solvent evaporation rate of  $\sim 1$   $\mu\text{L h}^{-1}$ . During this slow-drying process, yellow  $\delta$ -CsSnI<sub>3</sub> nanowires spontaneously formed. The resulting nanowire film was subsequently annealed at 160 °C for 20 min, leading to the formation of the black  $\gamma$ -CsSnI<sub>3</sub> phase. After phase transformation, a 5 wt% 3F-2NA

solution in chlorobenzene was spin-coated onto the nanowire array at 3000 rpm for 30 s, followed by a mild post-annealing step at 80 °C for 10 min to form a stable interfacial dipole layer.

Subsequently, a compact NiO<sub>x</sub> layer (20 nm) serving as the hole transport layer (HTL), followed by a 250 nm ITO top transparent electrode, were sequentially deposited onto the CsSnI<sub>3</sub> nanowires by sputtering.

Finally, the device was encapsulated with a thin PMMA layer to prevent the oxidation of Sn<sup>2+</sup> species.

### **S3. Characterization Techniques**

XRD measurements were carried out using a PANalytical X'Pert PRO diffractometer (Cu K $\alpha$ ,  $\lambda = 1.5406 \text{ \AA}$ ). XPS and UPS spectra were collected using a Shimadzu AXIS-ULTRA DLD-600 W system. Surface morphology was examined using a Nova Nano SEM 450. UV–Vis absorption spectra were recorded using a Lambda 950 spectrophotometer, while steady-state PL and TRPL spectra were measured using an Edinburgh FLS 980 system with a 405 nm excitation source.

The optoelectronic properties of the flexible CsSnI<sub>3</sub> nanowire photodetector were evaluated at room temperature under 850 nm laser illumination. A focused beam (~3 mm diameter) illuminated the active area (0.071 cm<sup>2</sup>), with the power density adjustable from  $1.33 \times 10^{-5}$  to  $8.39 \times 10^2 \text{ mW}\cdot\text{cm}^{-2}$ . Photoresponse curves were recorded with a Keithley 2400 source meter. Under a 0.1 V bias and 850 nm illumination, the power-dependent photocurrent, linear dynamic range, ON/OFF ratio, and temporal response were measured. The photocurrent shows linear dependence over the range of  $1.33 \times 10^{-5}$ – $8.39 \times 10^2 \text{ mW}\cdot\text{cm}^{-2}$ .

For the environmental storage test, the PMMA-encapsulated devices were stored under ambient laboratory conditions at approximately 20 °C and 40–60% relative humidity, and the photocurrent retention was periodically measured over 60 days. For the mechanical durability test, the devices were subjected to repeated bending at a fixed bending radius of 5 mm for up to 1000 cycles, and the photocurrent was recorded after selected bending intervals.

#### S4. Time-Resolved Photoluminescence (TRPL) Analysis

The time-resolved photoluminescence (TRPL) decay curves of CsSnI<sub>3</sub> nanowire films were fitted using a bi-exponential function, as shown in Equation (S1):

$$I(t) = A_1 e^{-\frac{t}{\tau_1}} + A_2 e^{-\frac{t}{\tau_2}} + I_0 \quad (\text{S1})$$

where  $A_1$  and  $A_2$  are the relative amplitudes,  $\tau_1$  and  $\tau_2$  are the fast and slow decay lifetimes, and  $I_0$  is a baseline offset.

The average carrier lifetime  $\tau_{average}$  was calculated using Equation (S2):

$$\tau_{average} = \frac{A_1 \tau_1^2 + A_2 \tau_2^2}{A_1 \tau_1 + A_2 \tau_2} \quad (\text{S2})$$

The fitted parameters ( $A_1, A_2, \tau_1, \tau_2$ ) were obtained from the bi-exponential fitting of Figure S14.

### Note S1. Calculation of EQE, NEP, and specific detectivity

The external quantum efficiency (EQE) of the photodetector was calculated from the measured responsivity according to:

$$EQE = \frac{Rhc}{q\lambda}$$

where  $R$  is the responsivity,  $h$  is Planck's constant,  $c$  is the speed of light,  $q$  is the elementary charge, and  $\lambda$  is the incident wavelength. When  $R$  is expressed in  $A W^{-1}$  and  $\lambda$  in nm, the equation can be written as:

$$EQE = \frac{1240R}{\lambda} \times 100\%$$

For the CsSnI<sub>3</sub> nanowire photodetector in this work,  $R=0.39 A W^{-1}$  at 850 nm, giving an EQE of approximately 56.9%.

To evaluate the noise characteristics of the CsSnI<sub>3</sub> nanowire photodetector, the frequency-resolved current noise spectral density was measured under dark conditions at a bias of 0.1 V. The noise-current spectral density  $i_n$  is expressed in units of  $A Hz^{-1/2}$ .

The corresponding noise-equivalent power (NEP) can be calculated as:

$$NEP = \frac{i_n}{R}$$

where  $R$  is the responsivity of the photodetector. Using the measured white-noise floor of approximately  $7.5 \times 10^{-15} A Hz^{-1/2}$  and  $R=0.39 A W^{-1}$  at 850 nm, the NEP is estimated to be approximately  $1.9 \times 10^{-14} W Hz^{-1/2}$ . The specific detectivity based on the measured noise-current spectral density is then calculated as:

$$D^* = \frac{\sqrt{S}}{NEP} = \frac{R\sqrt{S}}{i_n}$$

where  $S$  is the effective device area. In comparison, the shot-noise-limited noise current is estimated by:

$$i_{shot} = \sqrt{2qI_{dark}}$$

where  $q$  is the elementary charge and  $I_{dark}$  is the dark current. The corresponding shot-noise-limited detectivity is:

$$D_{shot}^* = \frac{R\sqrt{S}}{\sqrt{2qI_{dark}}}$$

In the present device, the measured noise spectrum exhibits a low-frequency 1/f-noise region and a high-frequency white-noise-limited region. The detectivity reported in the main text was evaluated using the measured noise-current spectral density in the white-noise-limited regime. This measured-noise-based analysis avoids relying solely on the ideal shot-noise-limited assumption and provides a more rigorous validation of the low-noise operation of the CsSnI<sub>3</sub> nanowire photodetector.

In Table S3, “measured-noise-based” indicates that NEP or  $D^*$  was calculated from the measured current-noise spectral density; “shot-noise-estimated” indicates that the noise was estimated from the dark-current shot-noise expression; and “ $D^*$ -derived” indicates that NEP was back-calculated from a reported  $D^*$  value when NEP was not directly reported.

## Note S2. Bending strain estimation and mechanical fatigue analysis

The bending strain during repeated mechanical deformation was estimated using the standard relation:

$$\varepsilon = \frac{t}{2R}$$

where  $t$  is the thickness of the mechanically dominant flexible substrate and  $R$  is the bending radius. In this work, the Al substrate thickness is approximately 0.2 mm and the bending radius was fixed at 5 mm. Therefore, the maximum surface strain is estimated to be:

$$\varepsilon = \frac{0.2 \text{ mm}}{2 \times 5 \text{ mm}} \approx 0.02 = 2\%$$

The flexible Al substrate accommodates a significant fraction of the applied strain because of its ductility. In addition, the vertically aligned CsSnI<sub>3</sub> nanowire architecture helps distribute the local strain and suppress long-range crack propagation compared with continuous thin films. After deposition of NiO<sub>x</sub> and ITO, the nanowires form a composite coated structure, which may reduce local mechanical compliance. Therefore, repeated bending can induce localized nanowire fracture or coating discontinuity. However, the overall nanowire network remains largely continuous after bending, preserving sufficient electrical pathways and enabling the device to retain ~94% of its initial photocurrent after 1000 bending cycles.

### **Note S3. DFT calculation details and dipole-moment analysis**

All adsorption-configuration optimizations of 3F-2NA on the CsSnI<sub>3</sub> (202) surface were performed using the CASTEP module in Materials Studio. The generalized gradient approximation (GGA) with the Perdew–Burke–Ernzerhof (PBE) exchange–correlation functional was employed, together with ultrasoft pseudopotentials. A plane-wave cutoff energy of 571.4 eV was used. The CsSnI<sub>3</sub> (202) surface was modeled using a periodic slab, and a vacuum layer larger than 15 Å was introduced along the surface-normal direction to avoid artificial interactions between adjacent slabs. A Monkhorst–Pack k-point grid of  $2 \times 2 \times 1$  was used for the surface calculations. The convergence criteria were set to  $2.0 \times 10^{-7}$  eV atom<sup>-1</sup> for total energy,  $2.4 \times 10^{-3}$  eV Å<sup>-1</sup> for maximum force, and  $1.4 \times 10^{-3}$  Å for maximum atomic displacement.

To further evaluate the intrinsic molecular polarity of 3F-2NA, an additional dipole-moment calculation was carried out using the DMol<sup>3</sup> module at the GGA-PBE level with a DNP basis set and all-electron treatment. The calculated molecular dipole moment is 6.11 Debye, with dipole-vector components of 0.844, 2.224, and 0.336 a.u. along the x, y, and z directions, respectively. The dipole vector is mainly dominated by the y-component, indicating pronounced anisotropic charge distribution within the molecule. The exact absolute value of the dipole moment may vary slightly depending on the computational implementation and basis description; nevertheless, both calculations consistently indicate that 3F-2NA possesses a relatively large intrinsic dipole. Different adsorption configurations mainly alter the orientation of this intrinsic dipole relative to the CsSnI<sub>3</sub> surface, thereby leading to distinct interfacial dipole-alignment tendencies.

#### **Note S4. Space-charge-limited current measurements of carrier-only CsSnI<sub>3</sub> nanowire devices**

To evaluate the trap density and carrier mobility of the CsSnI<sub>3</sub> nanowires, SCLC measurements were carried out using electron-only and hole-only devices. The trap density was estimated from the trap-filled-limit voltage according to:

$$N_t = \frac{2\varepsilon_0\varepsilon_r V_{TFL}}{qL^2}$$

where  $N_t$  is the trap density,  $\varepsilon_0$  is the vacuum permittivity,  $\varepsilon_r$  is the relative dielectric constant of CsSnI<sub>3</sub>,  $V_{TFL}$  is the trap-filled-limit voltage,  $q$  is the elementary charge, and  $L$  is the effective transport length.

The carrier mobility was extracted from the SCLC Child regime using:

$$J = \frac{9\varepsilon_0\varepsilon_r\mu V^2}{8L^3}$$

For nanowire-based carrier-only devices, the equation can also be expressed using the current along the nanowire:

$$I = JA$$

and therefore:

$$\mu = \frac{8LI}{9\varepsilon_0\varepsilon_r V^2}$$

where  $I$  is the current along the nanowire,  $V$  is the applied voltage, and  $L$  is the effective nanowire transport length. In this work,  $\varepsilon_0=8.8542\times 10^{-12}$  C V<sup>-1</sup> m<sup>-1</sup> and  $\varepsilon_r=29$  were used for CsSnI<sub>3</sub>. Based on the Child-regime fitting of the carrier-only SCLC curves, the electron and hole mobilities of the CsSnI<sub>3</sub> nanowires were estimated to be 762 and 692 cm<sup>2</sup> V<sup>-1</sup> s<sup>-1</sup>, respectively. These values should be regarded as effective mobilities of the CsSnI<sub>3</sub> nanowires under the carrier-only measurement geometry.

## S5. Supplementary Figures and Tables

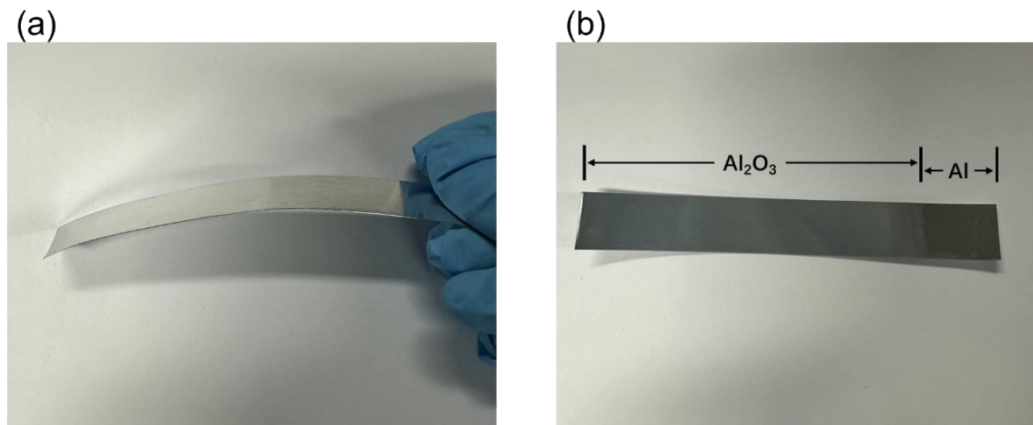

Figure S1. Photographs of 0.2 mm-thick 1060 aluminum foil before and after anodization. (a) Pristine smooth and flexible foil; (b) surface covered by a gray-white  $\text{Al}_2\text{O}_3$  layer after anodization.

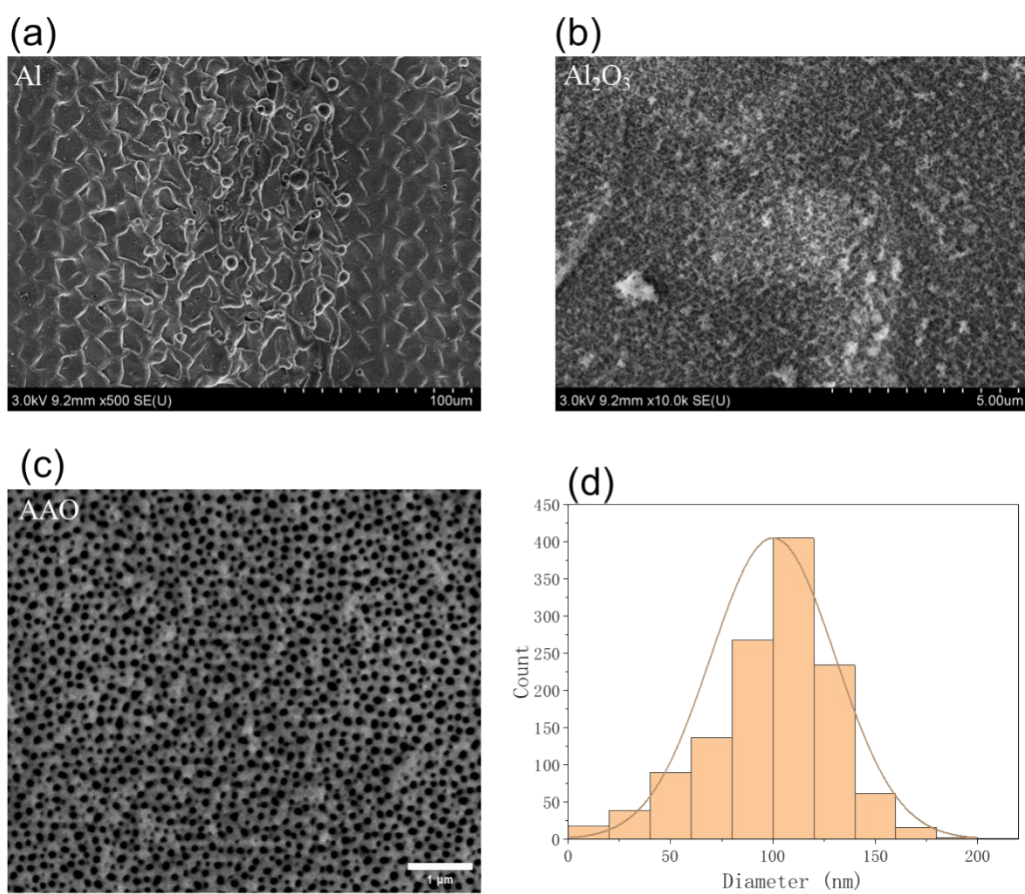

Figure S2. Surface morphology of aluminum foil before and after anodization. (a, b) scanning electron microscopy (SEM) images of pristine and anodized Al foil; (c) Top-view SEM image of anodic aluminum oxide (AAO) layer with ~100 nm pores (Scale bar: 1 μm); (d) Corresponding pore size distribution extracted from the SEM image in (c).

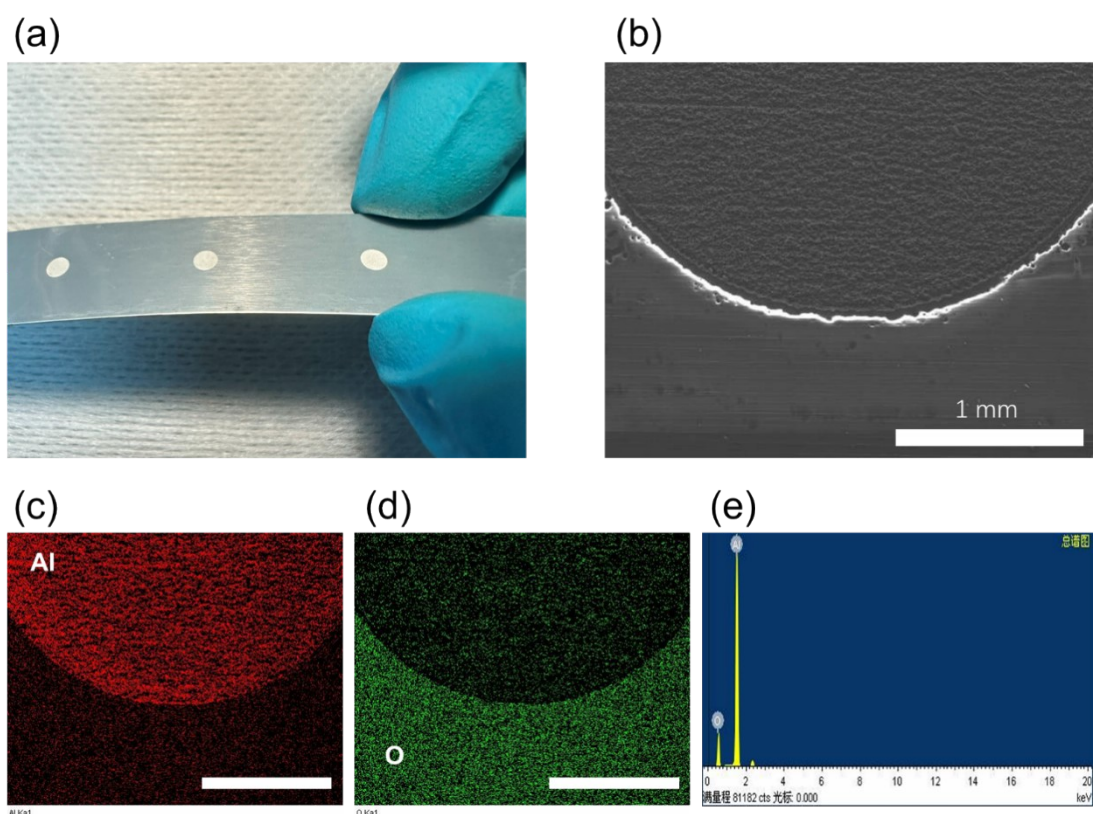

Figure S3. (a) Photograph of circular laser-ablation windows on the anodized Al foil; (b) SEM image of a localized laser-ablated region, showing the clear boundary between the exposed metallic Al and the remaining  $\text{Al}_2\text{O}_3$  layer (scale bar: 1 mm); (c, d) EDX elemental maps of Al and O, respectively (scale bars: 1 mm); (e) Corresponding EDX spectrum of anodized Al foil.

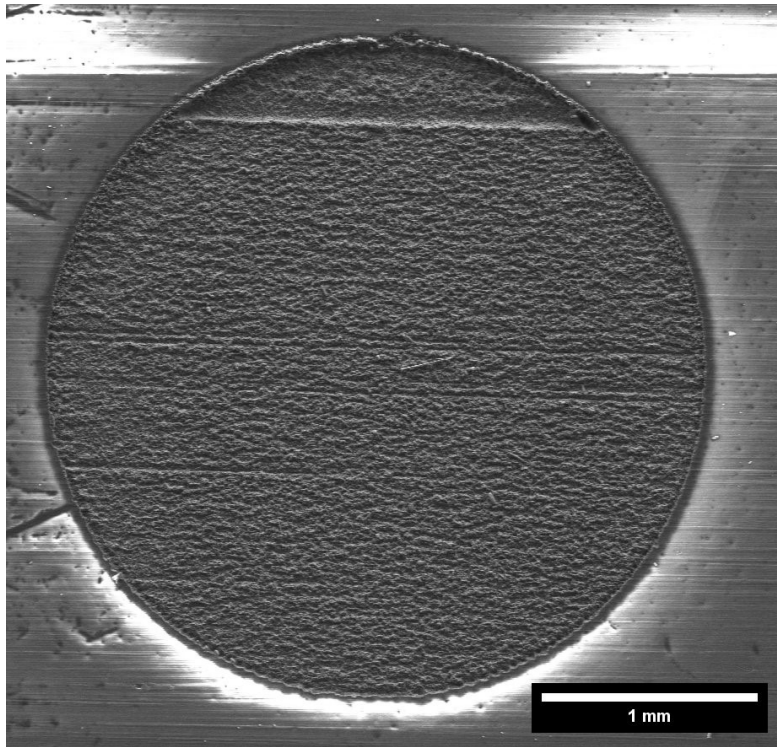

Figure S4. Scanning electron microscopy (SEM) image of the laser-patterned circular opening on the anodized  $\text{Al}_2\text{O}_3/\text{Al}$  substrate. The diameter of the opening is approximately 3 mm, corresponding to a geometric area of  $\sim 0.071 \text{ cm}^2$ . This region serves as the predefined active area for subsequent nanowire growth and device fabrication. Scale bar: 1 mm.

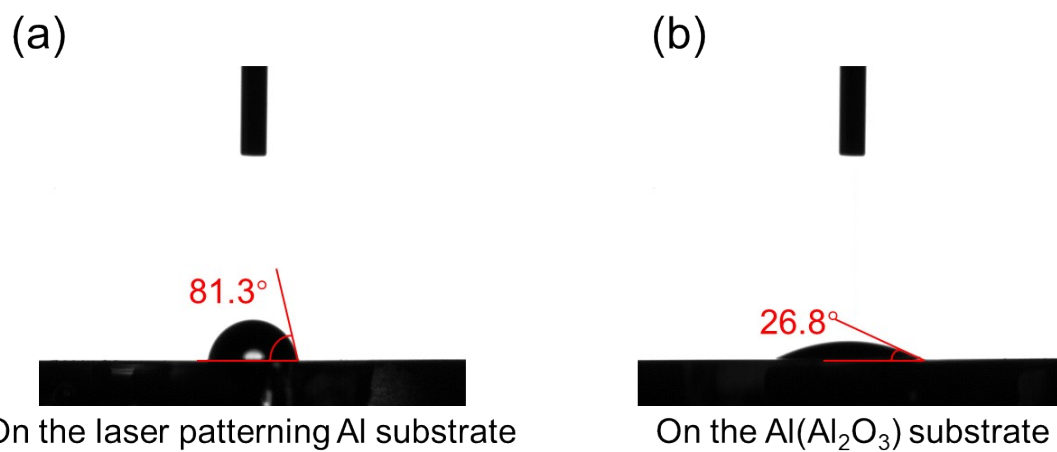

**Figure S5.** Contact-angle measurements of  $\text{CsSnI}_3$  precursor solution. (a) On laser-ablated Al surface ( $81.3^\circ$ ); (b) On anodized  $\text{Al}_2\text{O}_3$  surface ( $26.8^\circ$ ).

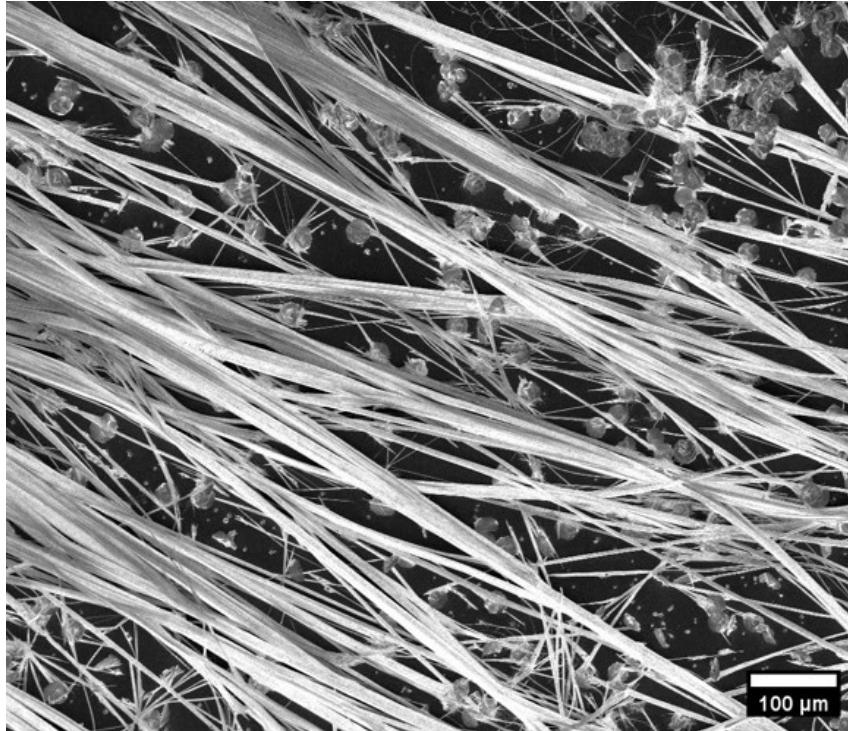

**Figure S6.** SEM image showing the lateral growth morphology of CsSnI<sub>3</sub> microwires formed on the anodized Al<sub>2</sub>O<sub>3</sub> surface (scale bar: 100 μm).

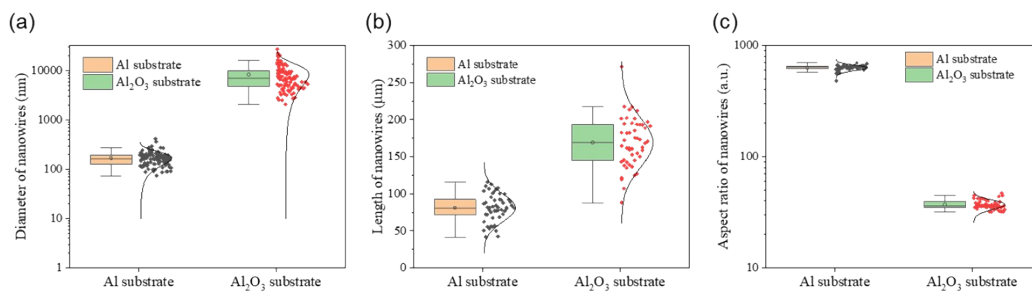

**Figure S7.** Statistical analysis of CsSnI<sub>3</sub> nanostructures grown on metallic Al and Al<sub>2</sub>O<sub>3</sub> substrates. (a) Diameter distributions of CsSnI<sub>3</sub> nanowires on metallic Al and microrods/microwires on Al<sub>2</sub>O<sub>3</sub>. (b) Length distributions of CsSnI<sub>3</sub> nanostructures grown on metallic Al and Al<sub>2</sub>O<sub>3</sub>. (c) Corresponding aspect-ratio distributions.

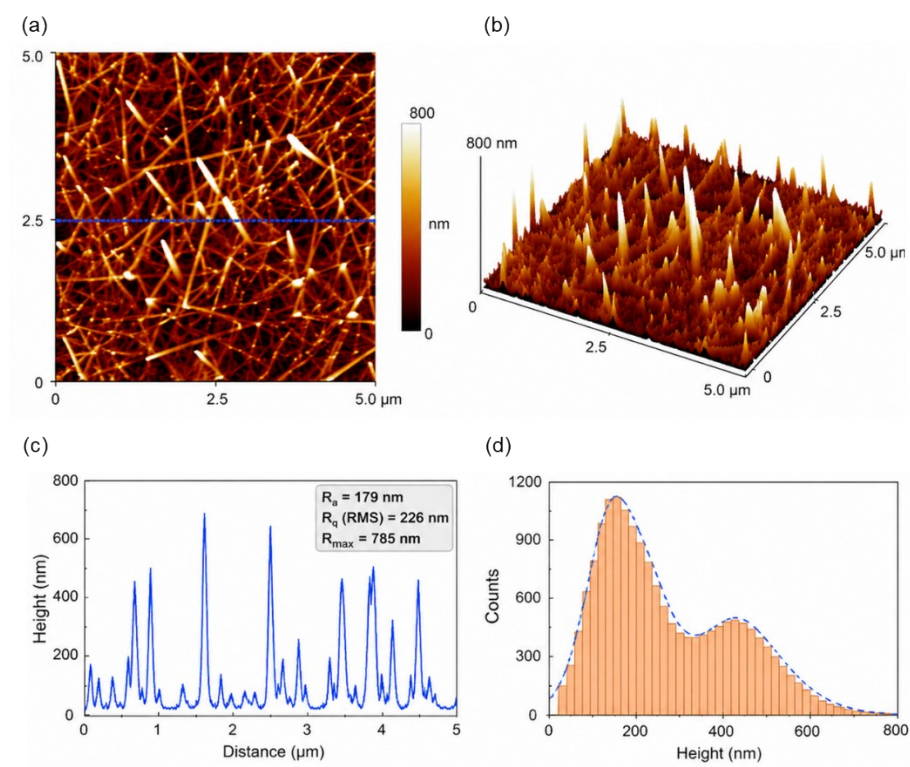

**Figure S8.** AFM characterization of the CsSnI<sub>3</sub> nanowire network grown on metallic Al. (a) 2D AFM height image measured over a 5 μm × 5 μm area. (b) Corresponding 3D AFM topography. (c) Representative line-scan profile along the marked region. The extracted root-mean-square roughness ( $R_q$ ) is ~226 nm, and the peak-to-valley height is ~785 nm. (d) Height distribution histogram extracted from the AFM height image.

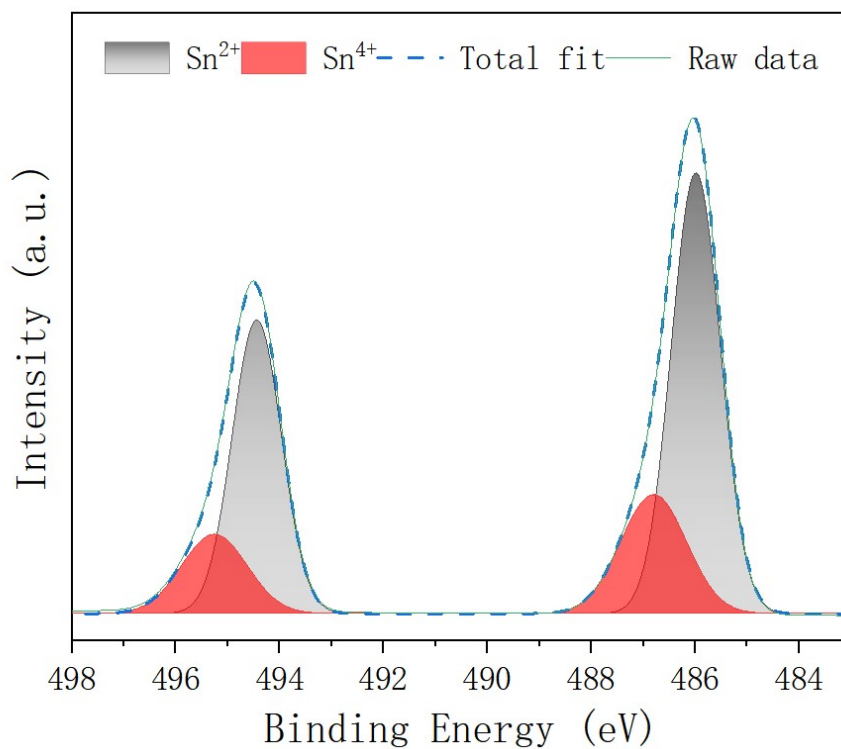

**Figure S9.** Sn 3d XPS of CsSnI<sub>3</sub> films grown on inert glass substrates under otherwise identical conditions. The fitted Sn<sup>2+</sup>/Sn<sup>4+</sup> ratio is 73.4%/26.6%, close to that of the Al<sub>2</sub>O<sub>3</sub>-supported sample and much lower than that of the metallic-Al-supported sample, supporting the substrate-dependent reductive effect of metallic Al.

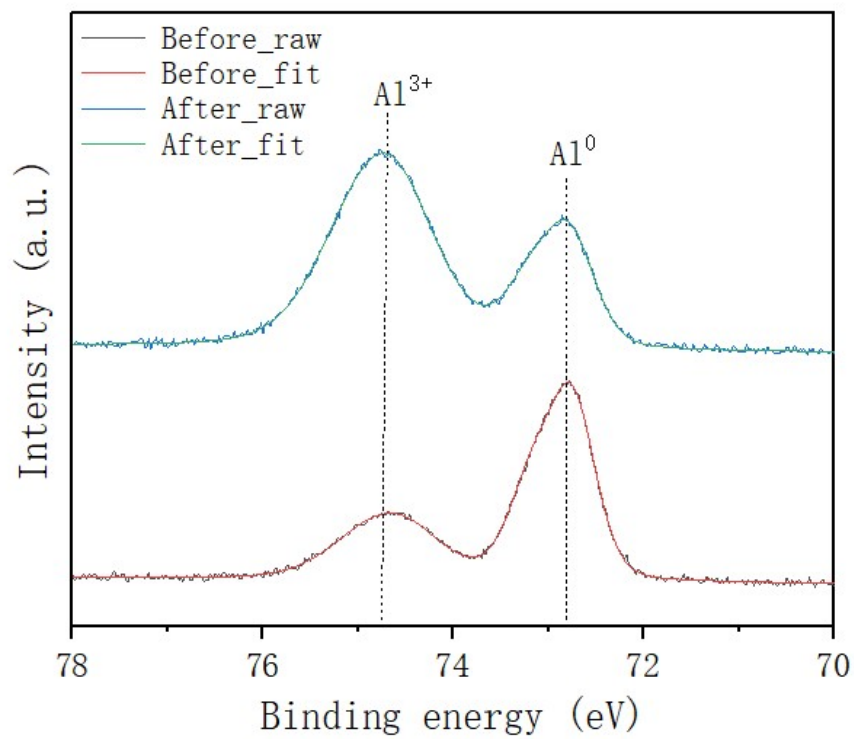

**Figure S10.** Al 2p XPS spectra of the laser-exposed Al surface before and after  $\text{CsSnI}_3$  growth.

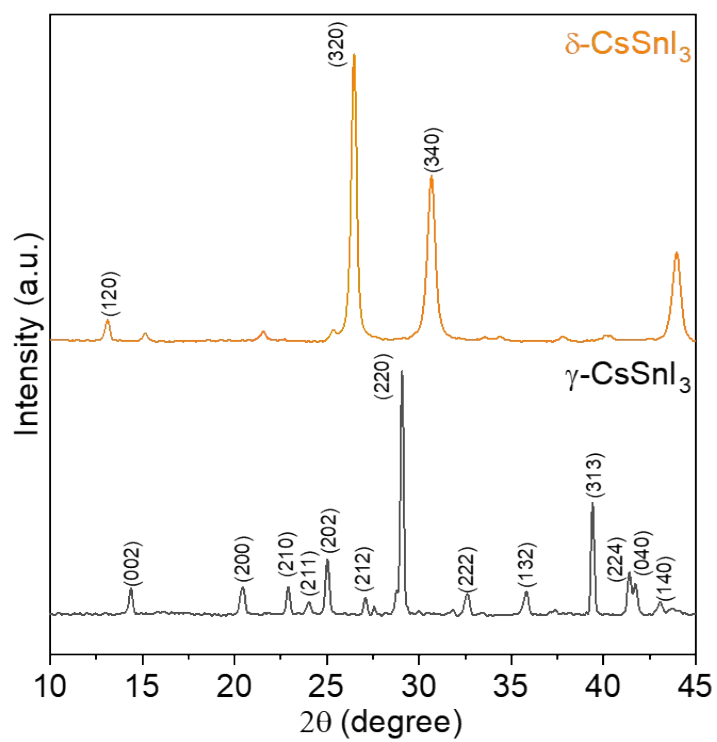

**Figure S11.** X-ray diffraction (XRD) patterns of CsSnI<sub>3</sub> showing the yellow  $\delta$ -phase before annealing and the black  $\gamma$ -phase after annealing at 160 °C.

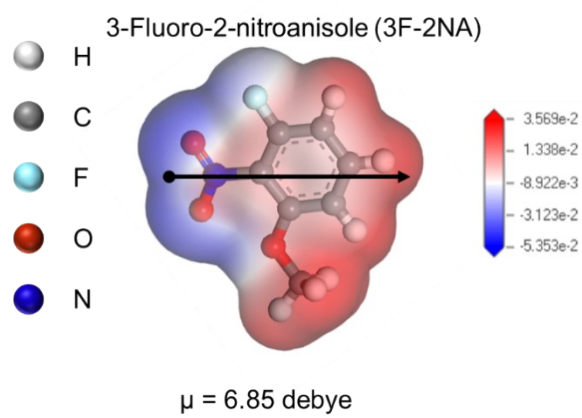

**Figure S12.** Molecular electrostatic potential (MEP) map of 3F-2NA.

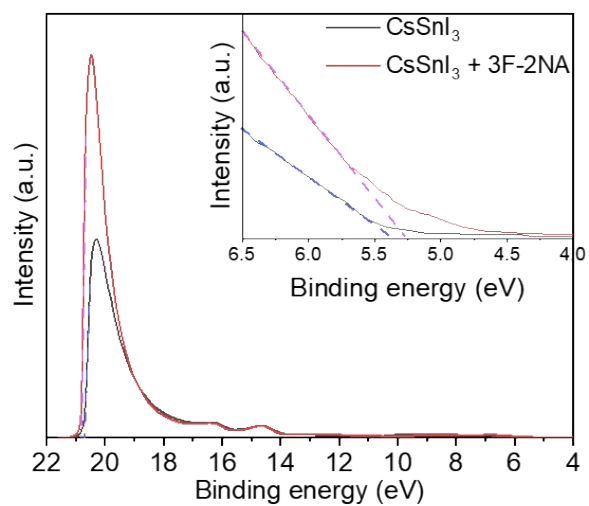

**Figure S13.** Ultraviolet photoelectron spectroscopy (UPS) spectra of pristine and 3F-2NA-modified CsSnI<sub>3</sub> films.

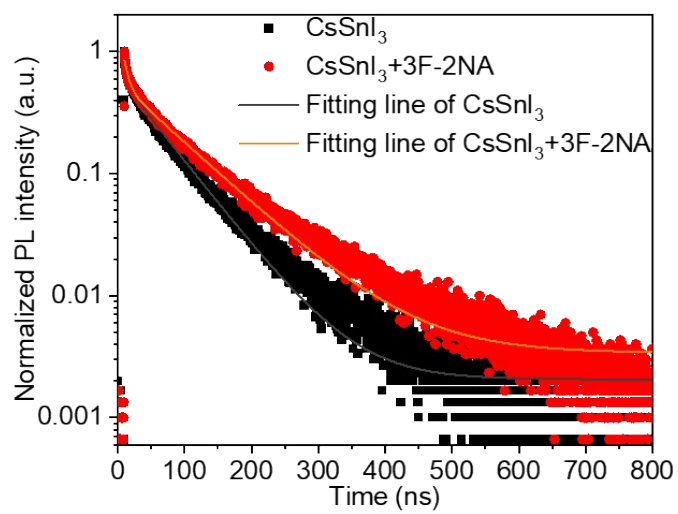

**Figure S14.** TRPL decay curves of CsSnI<sub>3</sub> nanowires with and without 3F-2NA modification, with bi-exponential fitting.

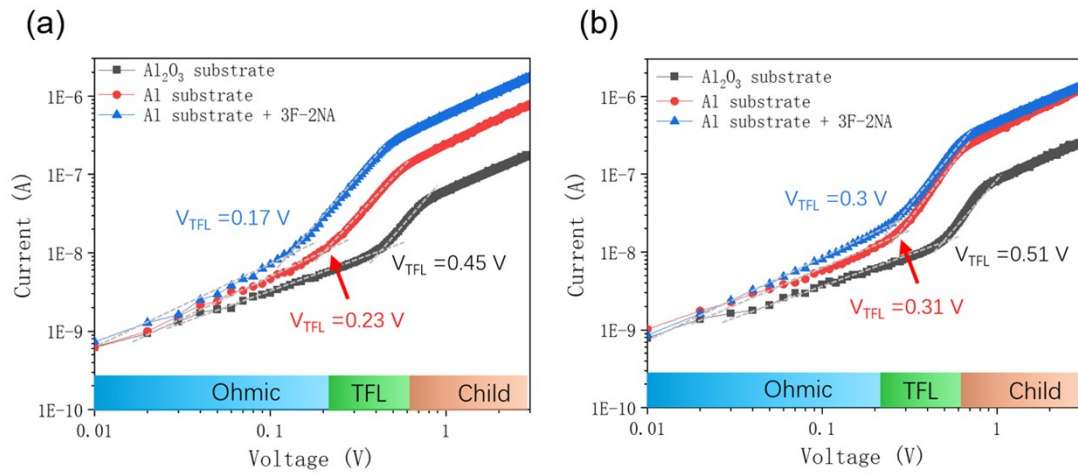

**Figure S15.** SCLC characterization of carrier-only CsSnI<sub>3</sub> nanowire devices.

(a) Current–voltage curves of electron-only devices fabricated on Al<sub>2</sub>O<sub>3</sub> substrate, Al substrate, and Al substrate with 3F-2NA modification. (b) Current–voltage curves of the corresponding hole-only devices.

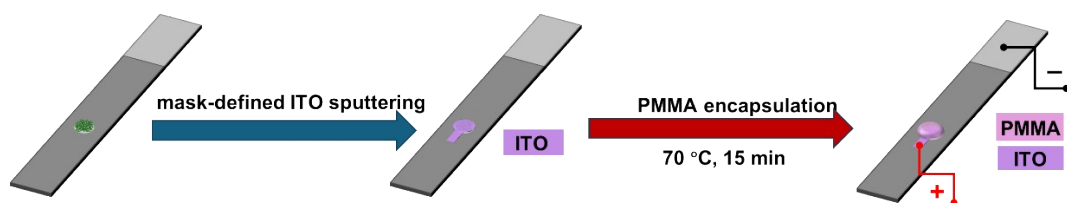

**Figure S16.** Shadow-mask-assisted deposition of ITO followed by PMMA encapsulation.

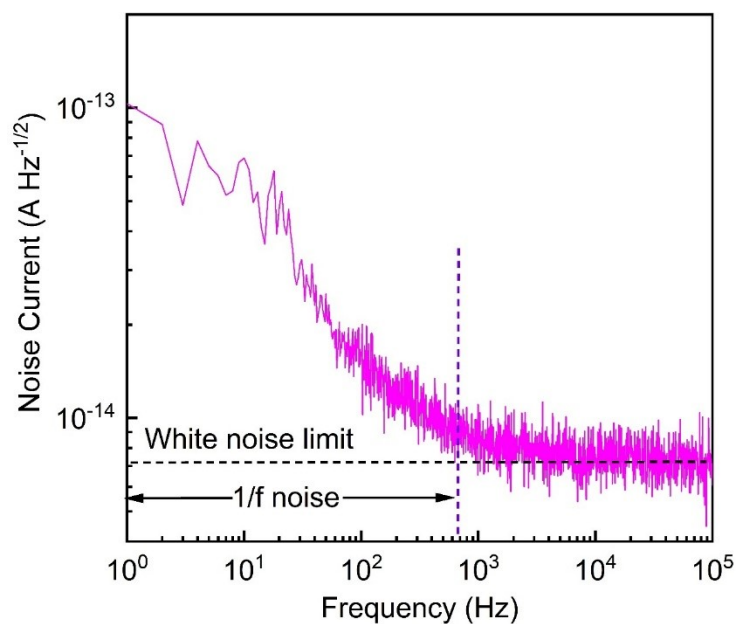

**Figure S17.** Noise-current spectral density of the CsSnI<sub>3</sub> nanowire photodetector. Frequency-resolved current noise spectral density measured under dark conditions at a bias of 0.1 V. The spectrum shows a low-frequency 1/f-noise region and a high-frequency white-noise-limited regime, with a white-noise floor of approximately  $7.5 \times 10^{-15}$  A Hz<sup>-1/2</sup>.

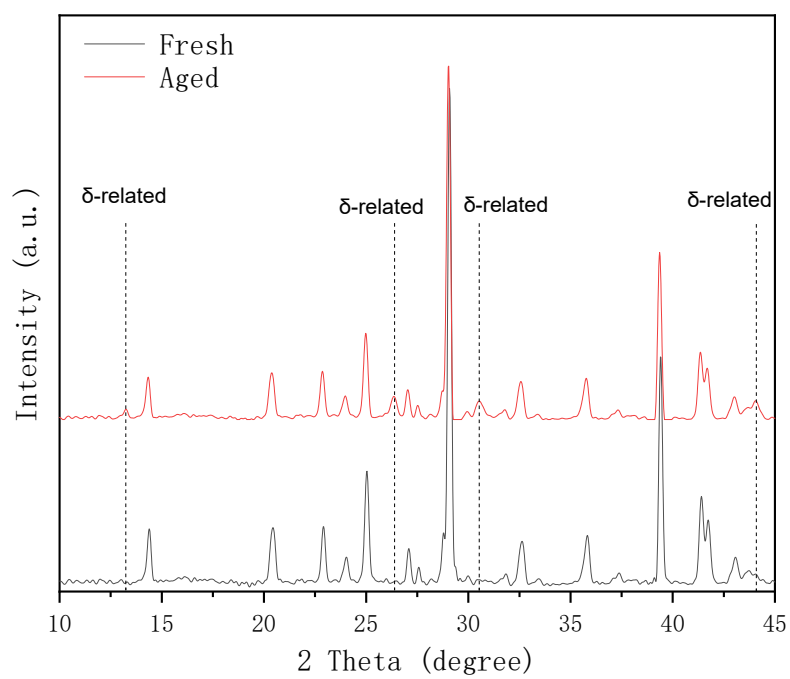

**Figure S18.** XRD comparison of fresh and aged CsSnI<sub>3</sub> nanowire films. The aged sample was stored under ambient laboratory conditions for 60 days.

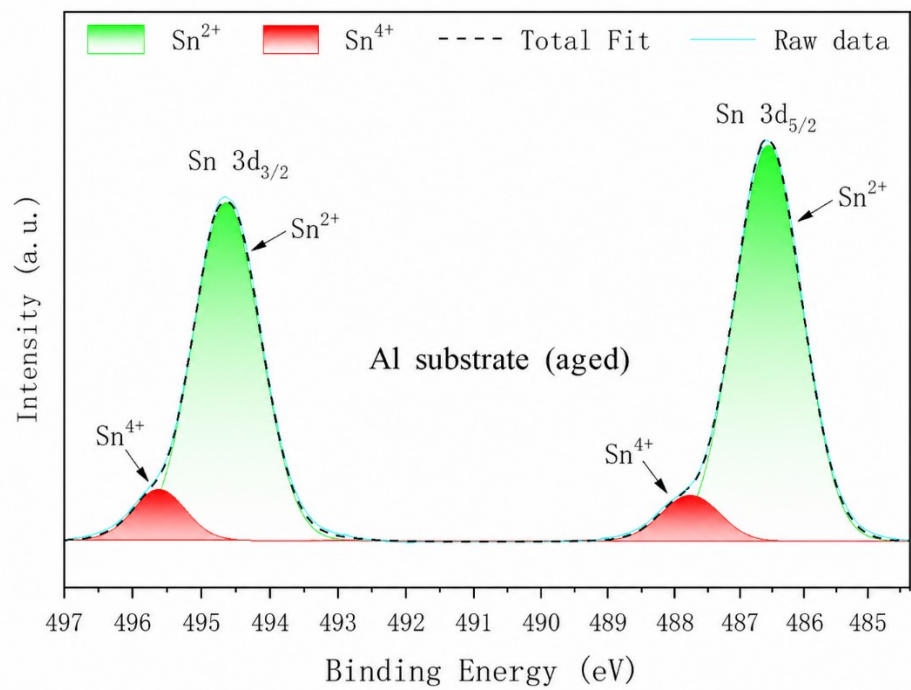

**Figure S19.** Sn 3d XPS of aged CsSnI<sub>3</sub> nanowire films.

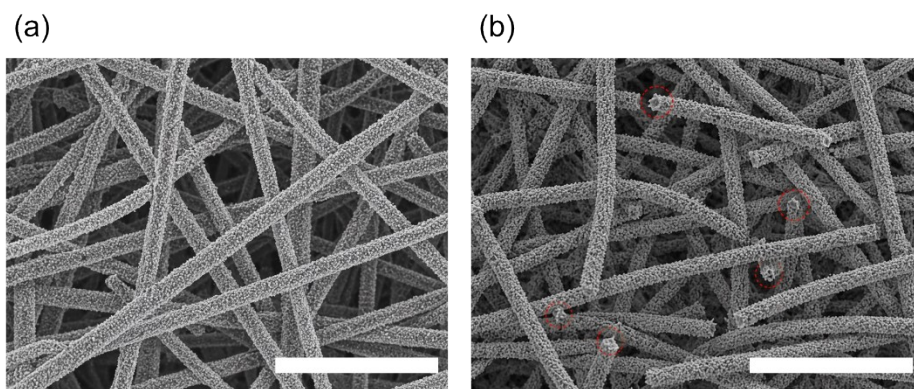

**Figure S20.** SEM images of ITO-coated CsSnI<sub>3</sub> nanowires before and after bending. (a) ITO-coated CsSnI<sub>3</sub> nanowire network before bending. (b) ITO-coated CsSnI<sub>3</sub> nanowire network after 1000 bending cycles, where localized defects and partial nanowire discontinuities are marked by red circles. Scale bars: 1  $\mu$ m.

**Table S1.** Bi-exponential TRPL fitting parameters for pristine and 3F-2NA-modified CsSnI<sub>3</sub>.

|                                   | <b>A<sub>1</sub></b> | <b>τ<sub>1</sub> (ns)</b> | <b>A<sub>2</sub></b> | <b>τ<sub>2</sub> (ns)</b> | <b>y<sub>0</sub></b> | <b>t<sub>avg</sub> (ns)</b> |
|-----------------------------------|----------------------|---------------------------|----------------------|---------------------------|----------------------|-----------------------------|
| <b>CsSnI<sub>3</sub></b>          | 0.331                | 6.334                     | 0.537                | 61.963                    | 0.002                | 58.67                       |
| <b>CsSnI<sub>3</sub> + 3F-2NA</b> | 0.343                | 6.714                     | 0.503                | 86.487                    | 0.003                | 82.47                       |

**Table S2.** Trap-density comparison of CsSnI<sub>3</sub> nanowires grown on different substrates and with interfacial modification.

| <b>Sample</b>                                               | <b>Electron trap density<br/>(cm<sup>-3</sup>)</b> | <b>Hole trap density<br/>(cm<sup>-3</sup>)</b> |
|-------------------------------------------------------------|----------------------------------------------------|------------------------------------------------|
| <b>CsSnI<sub>3</sub> NWs on Al<sub>2</sub>O<sub>3</sub></b> | 5.77×10 <sup>11</sup>                              | 6.54×10 <sup>11</sup>                          |
| <b>CsSnI<sub>3</sub> NWs on Al</b>                          | 2.95×10 <sup>11</sup>                              | 3.97×10 <sup>11</sup>                          |
| <b>CsSnI<sub>3</sub> NWs on Al with 3F-2NA</b>              | 2.05×10 <sup>11</sup>                              | 3.85×10 <sup>11</sup>                          |

**Table S3.** Benchmarking of the CsSnI<sub>3</sub> nanowire photodetector against representative

Pb-free NIR photodetectors. The table compares various photodetectors based on their external quantum efficiency (EQE), noise equivalent power (NEP), responsivity, wavelength, and operational lifetime/durability. The CsSnI<sub>3</sub> nanowire photodetector is highlighted in green, showing superior performance in several metrics compared to other representative devices.

| Category                | Material / Device                                                                   | Pb-free | Flexible | Wavelength (nm) | Responsivity (mA W <sup>-1</sup> ) | EQE (%)                                                         | D* (Jones)            | NEP (W Hz <sup>-1/2</sup> )    | Noise / NEP basis                                  | Response time     | LDR (dB) | Bias (V) | Operational lifetime / durability                                                                                       | Reference |
|-------------------------|-------------------------------------------------------------------------------------|---------|----------|-----------------|------------------------------------|-----------------------------------------------------------------|-----------------------|--------------------------------|----------------------------------------------------|-------------------|----------|----------|-------------------------------------------------------------------------------------------------------------------------|-----------|
| Lead-free Sh-based      | CsSnI <sub>3</sub> NW array                                                         | Yes     | Yes      | 850             | 390                                | 56.9% at 850 nm                                                 | $1.38 \times 10^{13}$ | $1.9 \times 10^{-14}$          | measured-noise-based; from white-noise floor and R | 30/30 ms          | 156      | 0.1      | 98% after 6000 s continuous ON/OFF operation; 65% after 60 d ambient storage; 94% after 1000 bending cycles             | This work |
| Lead-free Sh-based      | CsSnI <sub>3</sub> NW array                                                         | Yes     | No       | 940             | 54                                 | 7.1% at 940 nm                                                  | $3.85 \times 10^5$    | $\sim 2.6 \times 10^{-11}$     | shot-noise-estimated / D*-derived                  | 83.8/243.4 ms     | —        | 0.1      | Repeatable 940 nm photoresponse; PMMA-protected optical stability up to 6 d                                             | [1]       |
| Lead-free Sh-based      | CsSnI <sub>3</sub> NW array                                                         | Yes     | No       | 405             | 237                                | 72.6% at 405 nm                                                 | $1.18 \times 10^{12}$ | $\sim 1.7 \times 10^{-12}$     | estimated from reported noise                      | 0.23/0.19 ms      | 180      | 0        | No degradation after >1200 s continuous illumination; >90% after 60 d storage                                           | [2]       |
| Lead-free Sh-based      | FASnI <sub>3</sub> -CNI TF                                                          | Yes     | Yes      | 785             | 370                                | 63.2% at 785 nm                                                 | $9.12 \times 10^{12}$ | $2.1 \times 10^{-13}$          | measured-noise-based at 100 Hz                     | 4.17/3.91 $\mu$ s | —        | 0        | Wearable heart-rate monitoring under 200 $\mu$ W cm <sup>-2</sup> at 0 V                                                | [3]       |
| Lead-free Sh-based      | FASnI <sub>3</sub> -BDADI TF                                                        | Yes     | No       | 808             | 5900                               | apparent EQE = 90.6% at 808 nm; reported 60-80% over 400-900 nm | $1.06 \times 10^{14}$ | $\sim 1.9 \times 10^{-16}$     | shot-noise-estimated                               | 14.1/25.3 $\mu$ s | 96.44    | 0        | ~80% R retained after 50 d in N glovebox; ~80% photocurrent retained after continuous operation                         | [4]       |
| Lead-free Sh-based      | CsSnBr <sub>3</sub> QDs                                                             | Yes     | Yes      | 410             | 62.3                               | ~18.8% at 410 nm                                                | $4.27 \times 10^{11}$ | $\sim 9.1 \times 10^{-13}$     | shot-noise-estimated; not directly reported        | 50/51 ms          | —        | 3        | >80% photocurrent retained after 100 bending cycles                                                                     | [5]       |
| Lead-free Bi-based      | MAPbI <sub>3</sub> TF                                                               | Yes     | No       | 382             | 280                                | 90.9% at 382 nm; 0 V                                            | $8.8 \times 10^{12}$  | $\sim 5.7 \times 10^{-14}$     | D*-derived                                         | 0.38/0.45 s       | —        | 0        | Non-encapsulated devices stored in air (RH $\geq$ 75%, dark, room temperature) retained response over long-term storage | [6]       |
| Lead-free Bi-based      | MAPbI <sub>3</sub> Cl <sub>0.1</sub> TF                                             | Yes     | Yes      | 382             | 920                                | ~302% at 382 nm                                                 | $2.9 \times 10^{13}$  | $\sim 1.7 \times 10^{-14}$     | D*-derived / shot-noise-estimated                  | 0.46/0.41 s       | —        | 0        | Flexible device retained ~85% initial photoresponse after 5000 bending cycles                                           | [7]       |
| Lead-free Bi-based      | Cs <sub>2</sub> BiI <sub>2</sub> TF                                                 | Yes     | No       | 365             | 1570                               | ~509% at 365 nm                                                 | $3.38 \times 10^{13}$ | $\sim 1.5 \times 10^{-14}$     | D*-derived / shot-noise-estimated                  | 0.45/0.50 s       | —        | 0        | Ambient air, RH > 50%; room temperature. ~98% response retained after 100 d                                             | [8]       |
| Representative Pb-based | CsPbI <sub>3</sub> NW array                                                         | No      | No       | Halogen light   | 6.7                                | ~15-17% peak at ~430-500 nm; 1 V bias                           | $1.57 \times 10^6$    | $\sim 1.1 \times 10^{-9}$      | D*-derived; not directly reported                  | 292/234 ms        | —        | 5        | Stable cubic phase at room temperature; stable in IPA after 30 d                                                        | [9]       |
| Representative Pb-based | CsPbBr <sub>3</sub> NS                                                              | No      | Yes      | 517             | 640                                | ~15.4% at 517 nm                                                | —                     | $6.6 \times 10^{-14}$          | reported NEP                                       | 19/25 $\mu$ s     | —        | 10       | <2.6% fluctuation after 12 h illumination; >10000 bending cycles with <3% fluctuation                                   | [10]      |
| Representative Pb-based | CsPb <sub>0.9</sub> Sn <sub>0.1</sub> (Br <sub>1-x</sub> I <sub>x</sub> ) alloy NWs | No      | No       | 473             | 8.5                                | ~2.2% at 473 nm                                                 | $2 \times 10^{10}$    | $\sim 5.5-5.9 \times 10^{-12}$ | shot-noise-estimated                               | 4.25/4.82 ms      | 120      | 1        | Only ~10% photocurrent degradation after 30 min irradiation                                                             | [11]      |
| Representative Pb-based | MAPbI <sub>3</sub> NW array                                                         | No      | Yes      | 473             | 560                                | ~14.7% at 473 nm                                                | $4.18 \times 10^{12}$ | $\sim 3.6 \times 10^{-14}$     | shot-noise-estimated                               | 0.2/0.37 ms       | 89       | 5        | >80% performance retained after 30 d in air (65-65% RH); stable after bending                                           | [12]      |
| Representative Pb-based | MAPbI <sub>3</sub> NW array                                                         | No      | Yes      | 532             | 227                                | ~52.9% at 532 nm                                                | $1.36 \times 10^{11}$ | $\sim 6.5 \times 10^{-13}$     | D*-derived using 1 mm spot area                    | 61/42 ms          | —        | 0        | ~7.8% photocurrent decrease after 1500 bending cycles at ~75°                                                           | [13]      |
| Representative Pb-based | CsPbBr <sub>3</sub> TF                                                              | No      | No       | 405             | 965                                | ~295% at 405 nm                                                 | $3.39 \times 10^{10}$ | $1.9 \times 10^{-16}$          | D*-derived                                         | 20.51/30 ms       | —        | 0        | Vertical self-powered device retained ~70% photocurrent after 120 d air exposure                                        | [14]      |
| Representative Pb-based | MAPbI <sub>3-x</sub> Br <sub>x</sub> TF                                             | No      | No       | 632             | 45000                              | 8.84 $\times$ 10% at 632 nm                                     | $1.15 \times 10^{14}$ | $2.75 \times 10^{-16}$         | reported / measured-noise-based                    | 0.24/0.38 s       | —        | 0        | Non-encapsulated device; ~79% R loss after 500 h under simulated sunlight                                               | [15]      |

**Table S4.** Summary of the individual contributions of Al reductive contact, 3F-2NA dipolar interlayer, and PMMA encapsulation to device stability.

| Stabilization component | Main function                        | Supporting evidence                                                                                                       | Stability contribution                                                                              |
|-------------------------|--------------------------------------|---------------------------------------------------------------------------------------------------------------------------|-----------------------------------------------------------------------------------------------------|
| Metallic Al interface   | Growth-stage redox control           | Higher Sn <sup>2+</sup> fraction in CsSnI <sub>3</sub> grown on metallic Al than on Al <sub>2</sub> O <sub>3</sub> /glass | Suppresses Sn <sup>4+</sup> accumulation during nanowire crystallization                            |
| 3F-2NA dipolar layer    | Interfacial electronic stabilization | UPS-derived barrier reduction and TRPL lifetime increase                                                                  | Improves charge extraction and reduces interfacial recombination                                    |
| PMMA encapsulation      | External environmental protection    | Encapsulated/unencapsulated comparison under 850 nm cycling                                                               | Blocks moisture/oxygen-induced degradation                                                          |
| Complete device         | Hierarchical stabilization           | 6000 s operational stability, 60-day ambient storage, and 1000 bending cycles                                             | Combines growth-stage chemical stabilization, interface stabilization, and environmental protection |

**Table S5. Pixel-to-pixel reproducibility and working-pixel yield of the  $4 \times 4$  CsSnI<sub>3</sub> nanowire photodetector array.** The photocurrent was measured under 850 nm illumination at  $2.5 \times 10^2$  mW cm<sup>-2</sup> and 0.1 V bias, while the dark current was measured under complete dark conditions at 0.1 V bias.

| Pixel No.                  | Device ID | Dark current (A) | Photocurrent under 850 nm (A) | Normalized photocurrent (%) |
|----------------------------|-----------|------------------|-------------------------------|-----------------------------|
| 1                          | Pixel 1   | 3.47E-10         | 8.36E-05                      | 88.00                       |
| 2                          | Pixel 2   | 3.77E-10         | 8.74E-05                      | 92.00                       |
| 3                          | Pixel 3   | 3.97E-10         | 8.98E-05                      | 94.57                       |
| 4                          | Pixel 4   | 4.17E-10         | 9.15E-05                      | 96.29                       |
| 5                          | Pixel 5   | 4.32E-10         | 9.28E-05                      | 97.71                       |
| 6                          | Pixel 6   | 4.42E-10         | 9.45E-05                      | 99.43                       |
| 7                          | Pixel 7   | 4.52E-10         | 9.55E-05                      | 100.57                      |
| 8                          | Pixel 8   | 4.62E-10         | 9.66E-05                      | 101.71                      |
| 9                          | Pixel 9   | 4.72E-10         | 9.77E-05                      | 102.86                      |
| 10                         | Pixel 10  | 4.87E-10         | 9.93E-05                      | 104.57                      |
| 11                         | Pixel 11  | 5.02E-10         | 1.01E-04                      | 106.29                      |
| 12                         | Pixel 12  | 5.17E-10         | 1.03E-04                      | 108.00                      |
| 13                         | Pixel 13  | 5.32E-10         | 1.04E-04                      | 109.71                      |
| 14                         | Pixel 14  | 4.37E-10         | 9.39E-05                      | 98.86                       |
| 15                         | Pixel 15  | 3.92E-10         | 8.90E-05                      | 93.71                       |
| 16                         | Pixel 16  | 5.37E-10         | 1.00E-04                      | 105.71                      |
| <b>Average</b>             |           | <b>4.50E-10</b>  | <b>9.50E-05</b>               | <b>100.00</b>               |
| <b>Standard deviation</b>  |           | <b>5.61E-11</b>  | <b>5.81E-06</b>               | <b>6.11</b>                 |
| <b>RSD</b>                 |           | <b>12.47%</b>    | <b>6.11%</b>                  |                             |
| <b>Working-pixel yield</b> |           |                  | <b>16/16 = 100%</b>           |                             |
|                            |           |                  |                               |                             |
|                            |           |                  |                               |                             |

Notes: RSD = standard deviation / average × 100%. Normalized photocurrent is calculated relative to the average photocurrent.

## References

- 1 M. Han, J. Sun, M. Peng, N. Han, Z. Chen, D. Liu, Y. Guo, S. Zhao, C. Shan, T. Xu, X. Hao, W. Hu and Z. Yang, *J. Phys. Chem. C*, 2019, **123**, 17566–17573.
- 2 Z. Gao, H. Zhou, K. Dong, C. Wang, J. Wei, Z. Li, J. Li, Y. Liu, J. Zhao and G. Fang, *Nano-Micro Lett.*, 2022, **14**, 215.
- 3 T. Liu, J. Wang, Y. Liu, L. Min, L. Wang, Z. Yuan, H. Sun, L. Huang, L. Li and X. Meng, *Adv. Mater.*, 2024, **36**, 2400090.
- 4 Z. Lv, G. Pan, S. Wang, Y. Xie, H. Tang, D. Wang, H. Gao, Y. Mao and W. Xu, *Adv. Funct. Mater.*, 2026, e75511.
- 5 X. Ma, Y. Xu, S. Li, T. W. Lo, B. Zhang, A. L. Rogach and D. Lei, *Nano Lett.*, 2021, **21**, 9195–9202.
- 6 V. Vuong, S. V. N. Pammi, K. S. Pasupuleti, W. Hu, V. D. Tran, J. S. Jung, M. Kim, V. Pecunia and S. G. Yoon, *Adv. Opt. Mater.*, 2021, **9**, 2100192.
- 7 V.-H. Vuong, S. V. N. Pammi, S. Ippili, V. Jella, T. Nguyen Thi, K. Sairam Pasupuleti, M.-D. Kim, M. Ji Jeong, J.-R. Jeong, H. Sik Chang and S.-G. Yoon, *Chem. Eng. J.*, 2023, **458**, 141473.
- 8 V. Vuong, S. Ippili, S. V. N. Pammi, J. Bae, T. Yang, M. J. Jeong, H. S. Chang, M. Jeon, J. Choi, M. T. Tran, V. Tran, V. Jella and S. Yoon, *Small Methods*, 2024, **8**, 2400310.
- 9 A. Waleed, M. M. Tavakoli, L. Gu, S. Hussain, D. Zhang, S. Poddar, Z. Wang, R. Zhang and Z. Fan, *Nano Lett.*, 2017, **17**, 4951–4957.
- 10 J. Song, L. Xu, J. Li, J. Xue, Y. Dong, X. Li and H. Zeng, *Adv. Mater.*, 2016, **28**, 4861–4869.
- 11 X. Tang, H. Zhou, X. Pan, R. Liu, D. Wu and H. Wang, *ACS Appl. Mater. Interfaces*, 2020, **12**, 4843–4848.
- 12 D. Wu, H. Zhou, Z. Song, M. Zheng, R. Liu, X. Pan, H. Wan, J. Zhang, H. Wang, X. Li and H. Zeng, *ACS Nano*, 2020, **14**, 2777–2787.
- 13 J. Tao, Z. Xiao, J. Wang, C. Li, X. Sun, F. Li, X. Zou, G. Liao and Z. Zou, *J. Alloys Compd.*, 2020, **845**, 155311.
- 14 C. Perumalveeramalai, J. Zheng, Y. Wang, H. Guo, S. V. N. Pammi, R. Mudike and C. Li, *Chem. Eng. J.*, 2024, **492**, 152213.
- 15 S. V. N. Pammi, V. Tran, R. Maddaka, J. Eom, J. S. Jung, H. Jeong, M. Kim, V. Pecunia and S. G. Yoon, *Adv. Opt. Mater.*, 2020, **8**, 2000845.
